# Supplementary material for: TTFs nonsymmetrically fused with alkylthiophenic moieties
Source: publisher site journal article supplement (doi:10.3762/bjoc.11.71), 2015-05-05

# checkCIF/PLATON report

You have not supplied any structure factors. As a result the full set of tests cannot be run.

THIS REPORT IS FOR GUIDANCE ONLY. IF USED AS PART OF A REVIEW PROCEDURE FOR PUBLICATION, IT SHOULD NOT REPLACE THE EXPERTISE OF AN EXPERIENCED CRYSTALLOGRAPHIC REFEREE.

No syntax errors found.      CIF dictionary      Interpreting this report

## Datablock: CCDC-1051179

---

Bond precision:    C-C = 0.0046 Å                      Wavelength=0.71073

Cell:                      a=9.4587(5)              b=9.6256(4)              c=11.5993(6)  
                            alpha=90              beta=90              gamma=90  
Temperature:              150 K

|                | Calculated  | Reported      |
|----------------|-------------|---------------|
| Volume         | 1056.07(9)  | 1056.07(9)    |
| Space group    | P 21 21 21  | P2(1)2(1)2(1) |
| Hall group     | P 2ac 2ab   | ?             |
| Moiety formula | C9 H10 O S3 | ?             |
| Sum formula    | C9 H10 O S3 | C9 H10 O S3   |
| Mr             | 230.35      | 230.35        |
| Dx,g cm-3      | 1.449       | 1.449         |
| Z              | 4           | 4             |
| Mu (mm-1)      | 0.658       | 0.658         |
| F000           | 480.0       | 480.0         |
| F000'          | 481.62      |               |
| h,k,lmax       | 11,11,13    | 11,11,13      |
| Nref           | 1910[ 1122] | 1897          |
| Tmin,Tmax      | 0.854,0.936 | 0.827,0.937   |
| Tmin'          | 0.821       |               |

Correction method= # Reported T Limits: Tmin=0.827 Tmax=0.937  
AbsCorr = MULTI-SCAN

Data completeness= 1.69/0.99                      Theta(max)= 25.260

R(reflections)= 0.0329( 1690)                      wR2(reflections)= 0.0793( 1897)

S = 1.075                      Npar= 140

---

The following ALERTS were generated. Each ALERT has the format

**test-name\_ALERT\_alert-type\_alert-level.**

Click on the hyperlinks for more details of the test.

---

### 🟡 Alert level B

PLAT230\_ALERT\_2\_B Hirshfeld Test Diff for C6 -- C8 .. 7.3 su

---

### 🟢 Alert level C

PLAT213\_ALERT\_2\_C Atom C4A has ADP max/min Ratio ..... 3.3 oblate  
PLAT234\_ALERT\_4\_C Large Hirshfeld Difference C5 -- C4 .. 0.17 Ang.  
PLAT242\_ALERT\_2\_C Low Ueq as Compared to Neighbors for ..... C6 Check  
PLAT340\_ALERT\_3\_C Low Bond Precision on C-C Bonds ..... 0.0046 Ang.

---

### 🟠 Alert level G

PLAT005\_ALERT\_5\_G No \_iucr\_refine\_instructions\_details in the CIF Please Do !  
PLAT066\_ALERT\_1\_G Predicted and Reported Tmin&Tmax Range Identical ? Check  
PLAT230\_ALERT\_2\_G Hirshfeld Test Diff for C4A -- C5 .. 6.3 su  
PLAT300\_ALERT\_4\_G Atom Site Occupancy of >S3A is Constrained at 0.511 Check  
PLAT300\_ALERT\_4\_G Atom Site Occupancy of <S3 is Constrained at 0.489 Check  
PLAT300\_ALERT\_4\_G Atom Site Occupancy of >C4A is Constrained at 0.511 Check  
PLAT300\_ALERT\_4\_G Atom Site Occupancy of <C4 is Constrained at 0.489 Check  
PLAT301\_ALERT\_3\_G Main Residue Disorder ..... Percentage = 15 Note  
PLAT779\_ALERT\_4\_G Suspect or Irrelevant (Bond) Angle in CIF .... # 16 Check  
C4A -C2 -S3 1.555 1.555 1.555 14.80 Deg.  
PLAT779\_ALERT\_4\_G Suspect or Irrelevant (Bond) Angle in CIF .... # 24 Check  
C4 -C3 -S3A 1.555 1.555 1.555 14.30 Deg.  
PLAT779\_ALERT\_4\_G Suspect or Irrelevant (Bond) Angle in CIF .... # 30 Check  
C4 -C5 -S3A 1.555 1.555 1.555 17.20 Deg.  
PLAT779\_ALERT\_4\_G Suspect or Irrelevant (Bond) Angle in CIF .... # 32 Check  
C4A -C5 -S3 1.555 1.555 1.555 13.80 Deg.  
PLAT850\_ALERT\_4\_G Check Flack Parameter Exact Value 0.00 and su .. 0.12 Check  
PLAT899\_ALERT\_4\_G SHELXL97 is Deprecated and Succeeded by SHELXL 2014 Note

---

0 **ALERT level A** = Most likely a serious problem - resolve or explain  
1 **ALERT level B** = A potentially serious problem, consider carefully  
4 **ALERT level C** = Check. Ensure it is not caused by an omission or oversight  
14 **ALERT level G** = General information/check it is not something unexpected

1 ALERT type 1 CIF construction/syntax error, inconsistent or missing data  
4 ALERT type 2 Indicator that the structure model may be wrong or deficient  
2 ALERT type 3 Indicator that the structure quality may be low  
11 ALERT type 4 Improvement, methodology, query or suggestion  
1 ALERT type 5 Informative message, check

---

## Datablock: CCDC-1051177

---

Bond precision: C-C = 0.0041 A

Wavelength=0.71073

Cell: a=9.9526(3) b=12.2499(3) c=17.9352(4)  
alpha=81.381(1) beta=85.234(2) gamma=89.204(1)  
Temperature: 150 K

|                | Calculated    | Reported      |
|----------------|---------------|---------------|
| Volume         | 2154.46(10)   | 2154.46(10)   |
| Space group    | P -1          | P-1           |
| Hall group     | -P 1          | ?             |
| Moiety formula | C18 H18 N2 S7 | ?             |
| Sum formula    | C18 H18 N2 S7 | C18 H18 N2 S7 |
| Mr             | 486.76        | 486.76        |
| Dx,g cm-3      | 1.501         | 1.501         |
| Z              | 4             | 4             |
| Mu (mm-1)      | 0.739         | 0.739         |
| F000           | 1008.0        | 1008.0        |
| F000'          | 1011.67       |               |
| h,k,lmax       | 12,14,21      | 12,14,21      |
| Nref           | 8173          | 8009          |
| Tmin,Tmax      | 0.837,0.985   | 0.709,0.985   |
| Tmin'          | 0.691         |               |

Correction method= # Reported T Limits: Tmin=0.709 Tmax=0.985  
AbsCorr = MULTI-SCAN

Data completeness= 0.980                      Theta(max)= 25.680

R(reflections)= 0.0387( 5668)              wR2(reflections)= 0.0904( 8009)

S = 1.019                                      Npar= 599

The following ALERTS were generated. Each ALERT has the format

**test-name\_ALERT\_alert-type\_alert-level.**

Click on the hyperlinks for more details of the test.

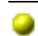

#### Alert level C

|                                                         |                                        |        |        |
|---------------------------------------------------------|----------------------------------------|--------|--------|
| PLAT213_ALERT_2_C Atom C3                               | has ADP max/min Ratio .....            | 3.3    | prolat |
| PLAT213_ALERT_2_C Atom C21                              | has ADP max/min Ratio .....            | 3.4    | prolat |
| PLAT220_ALERT_2_C Large Non-Solvent C                   | Ueq(max)/Ueq(min) Range                | 4.3    | Ratio  |
| PLAT220_ALERT_2_C Large Non-Solvent C                   | Ueq(max)/Ueq(min) Range                | 5.8    | Ratio  |
| PLAT222_ALERT_3_C Large Non-Solvent H                   | Uiso(max)/Uiso(min) ...                | 5.3    | Ratio  |
| PLAT234_ALERT_4_C Large Hirshfeld Difference C5         | -- C6A ..                              | 0.17   | Ang.   |
| PLAT241_ALERT_2_C High                                  | Ueq as Compared to Neighbors for ..... | S3     | Check  |
| PLAT241_ALERT_2_C High                                  | Ueq as Compared to Neighbors for ..... | S9     | Check  |
| PLAT242_ALERT_2_C Low                                   | Ueq as Compared to Neighbors for ..... | C1     | Check  |
| PLAT242_ALERT_2_C Low                                   | Ueq as Compared to Neighbors for ..... | C19    | Check  |
| PLAT340_ALERT_3_C Low Bond Precision on C-C Bonds ..... |                                        | 0.0041 | Ang.   |

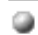

#### Alert level G

|                                                                    |                   |       |             |
|--------------------------------------------------------------------|-------------------|-------|-------------|
| PLAT003_ALERT_2_G Number of Uiso or Uij Restrained non-H Atoms ... |                   | 3     | Report      |
| PLAT005_ALERT_5_G No _iucr_refine_instructions_details in the CIF  |                   |       | Please Do ! |
| PLAT230_ALERT_2_G Hirshfeld Test Diff for C32                      | -- C33 ..         | 6.0   | su          |
| PLAT230_ALERT_2_G Hirshfeld Test Diff for C35                      | -- C36 ..         | 6.0   | su          |
| PLAT300_ALERT_4_G Atom Site Occupancy of >S1                       | is Constrained at | 0.709 | Check       |
| PLAT300_ALERT_4_G Atom Site Occupancy of <S1a                      | is Constrained at | 0.291 | Check       |
| PLAT300_ALERT_4_G Atom Site Occupancy of >N2                       | is Constrained at | 0.794 | Check       |

|                   |                                                  |                   |       |       |
|-------------------|--------------------------------------------------|-------------------|-------|-------|
| PLAT300_ALERT_4_G | Atom Site Occupancy of >C2                       | is Constrained at | 0.725 | Check |
| PLAT300_ALERT_4_G | Atom Site Occupancy of >C3                       | is Constrained at | 0.725 | Check |
| PLAT300_ALERT_4_G | Atom Site Occupancy of >C4                       | is Constrained at | 0.725 | Check |
| PLAT300_ALERT_4_G | Atom Site Occupancy of >C6                       | is Constrained at | 0.709 | Check |
| PLAT300_ALERT_4_G | Atom Site Occupancy of >C16                      | is Constrained at | 0.794 | Check |
| PLAT300_ALERT_4_G | Atom Site Occupancy of >C17                      | is Constrained at | 0.794 | Check |
| PLAT300_ALERT_4_G | Atom Site Occupancy of >C18                      | is Constrained at | 0.794 | Check |
| PLAT300_ALERT_4_G | Atom Site Occupancy of <N2A                      | is Constrained at | 0.206 | Check |
| PLAT300_ALERT_4_G | Atom Site Occupancy of <C2A                      | is Constrained at | 0.275 | Check |
| PLAT300_ALERT_4_G | Atom Site Occupancy of <C3A                      | is Constrained at | 0.275 | Check |
| PLAT300_ALERT_4_G | Atom Site Occupancy of <C4A                      | is Constrained at | 0.275 | Check |
| PLAT300_ALERT_4_G | Atom Site Occupancy of <C6A                      | is Constrained at | 0.291 | Check |
| PLAT300_ALERT_4_G | Atom Site Occupancy of <C16A                     | is Constrained at | 0.206 | Check |
| PLAT300_ALERT_4_G | Atom Site Occupancy of <C17A                     | is Constrained at | 0.206 | Check |
| PLAT300_ALERT_4_G | Atom Site Occupancy of <C18A                     | is Constrained at | 0.206 | Check |
| PLAT300_ALERT_4_G | Atom Site Occupancy of >S8                       | is Constrained at | 0.773 | Check |
| PLAT300_ALERT_4_G | Atom Site Occupancy of <S8A                      | is Constrained at | 0.227 | Check |
| PLAT300_ALERT_4_G | Atom Site Occupancy of >C24                      | is Constrained at | 0.773 | Check |
| PLAT300_ALERT_4_G | Atom Site Occupancy of <C24A                     | is Constrained at | 0.227 | Check |
| PLAT301_ALERT_3_G | Main Residue Disorder .....                      | Percentage =      | 20    | Note  |
| PLAT720_ALERT_4_G | Number of Unusual/Non-Standard Labels .....      |                   | 9     | Note  |
| PLAT779_ALERT_4_G | Suspect or Irrelevant (Bond) Angle in CIF .... # |                   | 8     | Check |
|                   | C16A -S7 -C16                                    | 1.555 1.555 1.555 | 34.60 | Deg.  |
| PLAT779_ALERT_4_G | Suspect or Irrelevant (Bond) Angle in CIF .... # |                   | 18    | Check |
|                   | C2A -C1 -C2                                      | 1.555 1.555 1.555 | 33.40 | Deg.  |
| PLAT779_ALERT_4_G | Suspect or Irrelevant (Bond) Angle in CIF .... # |                   | 31    | Check |
|                   | C4 -C1 -C4A                                      | 1.555 1.555 1.555 | 37.40 | Deg.  |
| PLAT779_ALERT_4_G | Suspect or Irrelevant (Bond) Angle in CIF .... # |                   | 39    | Check |
|                   | C6 -C5 -S1A                                      | 1.555 1.555 1.555 | 14.20 | Deg.  |
| PLAT779_ALERT_4_G | Suspect or Irrelevant (Bond) Angle in CIF .... # |                   | 43    | Check |
|                   | C6A -C5 -S1                                      | 1.555 1.555 1.555 | 15.60 | Deg.  |
| PLAT779_ALERT_4_G | Suspect or Irrelevant (Bond) Angle in CIF .... # |                   | 48    | Check |
|                   | C6 -C7 -S1A                                      | 1.555 1.555 1.555 | 15.80 | Deg.  |
| PLAT779_ALERT_4_G | Suspect or Irrelevant (Bond) Angle in CIF .... # |                   | 54    | Check |
|                   | C6A -C8 -S1                                      | 1.555 1.555 1.555 | 16.80 | Deg.  |
| PLAT779_ALERT_4_G | Suspect or Irrelevant (Bond) Angle in CIF .... # |                   | 110   | Check |
|                   | C24 -C23 -S8A                                    | 1.555 1.555 1.555 | 15.60 | Deg.  |
| PLAT779_ALERT_4_G | Suspect or Irrelevant (Bond) Angle in CIF .... # |                   | 114   | Check |
|                   | C24A -C23 -S8                                    | 1.555 1.555 1.555 | 12.90 | Deg.  |
| PLAT779_ALERT_4_G | Suspect or Irrelevant (Bond) Angle in CIF .... # |                   | 119   | Check |
|                   | C24 -C25 -S8A                                    | 1.555 1.555 1.555 | 14.40 | Deg.  |
| PLAT779_ALERT_4_G | Suspect or Irrelevant (Bond) Angle in CIF .... # |                   | 125   | Check |
|                   | C24A -C26 -S8                                    | 1.555 1.555 1.555 | 16.70 | Deg.  |
| PLAT860_ALERT_3_G | Number of Least-Squares Restraints .....         |                   | 24    | Note  |
| PLAT899_ALERT_4_G | SHELXL97 is Deprecated and Succeeded by SHELXL   |                   | 2014  | Note  |

---

0 **ALERT level A** = Most likely a serious problem - resolve or explain  
 0 **ALERT level B** = A potentially serious problem, consider carefully  
 11 **ALERT level C** = Check. Ensure it is not caused by an omission or oversight  
 41 **ALERT level G** = General information/check it is not something unexpected

0 ALERT type 1 CIF construction/syntax error, inconsistent or missing data  
 11 ALERT type 2 Indicator that the structure model may be wrong or deficient  
 4 ALERT type 3 Indicator that the structure quality may be low  
 36 ALERT type 4 Improvement, methodology, query or suggestion  
 1 ALERT type 5 Informative message, check

---

**Datablock: CCDC-1051178**

---

Bond precision: C-C = 0.0041 Å

Wavelength=0.71073

Cell: a=7.2530(1) b=8.3877(1) c=26.2705(4)  
alpha=86.235(1) beta=86.176(1) gamma=71.720(1)  
Temperature: 150 K

|                        | Calculated                 | Reported                   |
|------------------------|----------------------------|----------------------------|
| Volume                 | 1512.47(4)                 | 1512.47(4)                 |
| Space group            | P -1                       | P-1                        |
| Hall group             | -P 1                       | ?                          |
| Moiety formula         | C15 H12 N2 S7, C8 Au N4 S4 | C15 H12 N2 S7, C8 Au N4 S4 |
| Sum formula            | C23 H12 Au N6 S11          | C23 H12 Au N6 S11          |
| Mr                     | 922.02                     | 922.01                     |
| Dx, g cm <sup>-3</sup> | 2.025                      | 2.025                      |
| Z                      | 2                          | 2                          |
| Mu (mm <sup>-1</sup> ) | 5.652                      | 5.652                      |
| F000                   | 894.0                      | 894.0                      |
| F000'                  | 892.98                     |                            |
| h,k,lmax               | 9,10,32                    | 9,10,32                    |
| Nref                   | 6181                       | 6102                       |
| Tmin,Tmax              | 0.513,0.798                | 0.211,0.805                |
| Tmin'                  | 0.103                      |                            |

Correction method= # Reported T Limits: Tmin=0.211 Tmax=0.805  
AbsCorr = MULTI-SCAN

Data completeness= 0.987

Theta(max)= 26.370

R(reflections)= 0.0173( 6057)

wR2(reflections)= 0.0421( 6102)

S = 1.253

Npar= 390

---

The following ALERTS were generated. Each ALERT has the format  
**test-name\_ALERT\_alert-type\_alert-level.**  
Click on the hyperlinks for more details of the test.

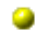

#### Alert level C

|                                       |                         |           |
|---------------------------------------|-------------------------|-----------|
| PLAT220_ALERT_2_C Large Non-Solvent C | Ueq(max)/Ueq(min) Range | 3.2 Ratio |
|---------------------------------------|-------------------------|-----------|

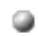

#### Alert level G

|                                                                    |                |
|--------------------------------------------------------------------|----------------|
| PLAT003_ALERT_2_G Number of Uiso or Uij Restrained non-H Atoms ... | 2 Report       |
| PLAT005_ALERT_5_G No _iucr_refine_instructions_details in the CIF  | Please Do !    |
| PLAT154_ALERT_1_G The su's on the Cell Angles are Equal .....      | 0.00100 Degree |
| PLAT230_ALERT_2_G Hirshfeld Test Diff for S7 -- C12 ..             | 6.1 su         |
| PLAT230_ALERT_2_G Hirshfeld Test Diff for S7A -- C12 ..            | 5.6 su         |
| PLAT300_ALERT_4_G Atom Site Occupancy of >S7 is Constrained at     | 0.551 Check    |
| PLAT300_ALERT_4_G Atom Site Occupancy of <S7A is Constrained at    | 0.449 Check    |
| PLAT300_ALERT_4_G Atom Site Occupancy of >C11 is Constrained at    | 0.551 Check    |
| PLAT300_ALERT_4_G Atom Site Occupancy of <C11A is Constrained at   | 0.449 Check    |

|                                                                    |                   |       |       |
|--------------------------------------------------------------------|-------------------|-------|-------|
| PLAT301_ALERT_3_G Main Residue Disorder .....                      | Percentage =      | 5     | Note  |
| PLAT779_ALERT_4_G Suspect or Irrelevant (Bond) Angle in CIF .... # |                   | 35    | Check |
| C11A -C9 -S7                                                       | 1.555 1.555 1.555 | 9.60  | Deg.  |
| PLAT779_ALERT_4_G Suspect or Irrelevant (Bond) Angle in CIF .... # |                   | 41    | Check |
| C11 -C10 -S7A                                                      | 1.555 1.555 1.555 | 9.70  | Deg.  |
| PLAT779_ALERT_4_G Suspect or Irrelevant (Bond) Angle in CIF .... # |                   | 48    | Check |
| C11 -C12 -S7A                                                      | 1.555 1.555 1.555 | 12.10 | Deg.  |
| PLAT779_ALERT_4_G Suspect or Irrelevant (Bond) Angle in CIF .... # |                   | 52    | Check |
| C11A -C12 -S7                                                      | 1.555 1.555 1.555 | 13.10 | Deg.  |
| PLAT860_ALERT_3_G Number of Least-Squares Restraints .....         |                   | 12    | Note  |
| PLAT899_ALERT_4_G SHELXL97 is Deprecated and Succeeded by SHELXL   |                   | 2014  | Note  |

---

0 **ALERT level A** = Most likely a serious problem - resolve or explain  
0 **ALERT level B** = A potentially serious problem, consider carefully  
1 **ALERT level C** = Check. Ensure it is not caused by an omission or oversight  
16 **ALERT level G** = General information/check it is not something unexpected

1 ALERT type 1 CIF construction/syntax error, inconsistent or missing data  
4 ALERT type 2 Indicator that the structure model may be wrong or deficient  
2 ALERT type 3 Indicator that the structure quality may be low  
9 ALERT type 4 Improvement, methodology, query or suggestion  
1 ALERT type 5 Informative message, check

---

It is advisable to attempt to resolve as many as possible of the alerts in all categories. Often the minor alerts point to easily fixed oversights, errors and omissions in your CIF or refinement strategy, so attention to these fine details can be worthwhile. In order to resolve some of the more serious problems it may be necessary to carry out additional measurements or structure refinements. However, the purpose of your study may justify the reported deviations and the more serious of these should normally be commented upon in the discussion or experimental section of a paper or in the "special\_details" fields of the CIF. checkCIF was carefully designed to identify outliers and unusual parameters, but every test has its limitations and alerts that are not important in a particular case may appear. Conversely, the absence of alerts does not guarantee there are no aspects of the results needing attention. It is up to the individual to critically assess their own results and, if necessary, seek expert advice.

### Publication of your CIF in IUCr journals

A basic structural check has been run on your CIF. These basic checks will be run on all CIFs submitted for publication in IUCr journals (*Acta Crystallographica*, *Journal of Applied Crystallography*, *Journal of Synchrotron Radiation*); however, if you intend to submit to *Acta Crystallographica Section C* or *E*, you should make sure that full publication checks are run on the final version of your CIF prior to submission.

### Publication of your CIF in other journals

Please refer to the *Notes for Authors* of the relevant journal for any special instructions relating to CIF submission.

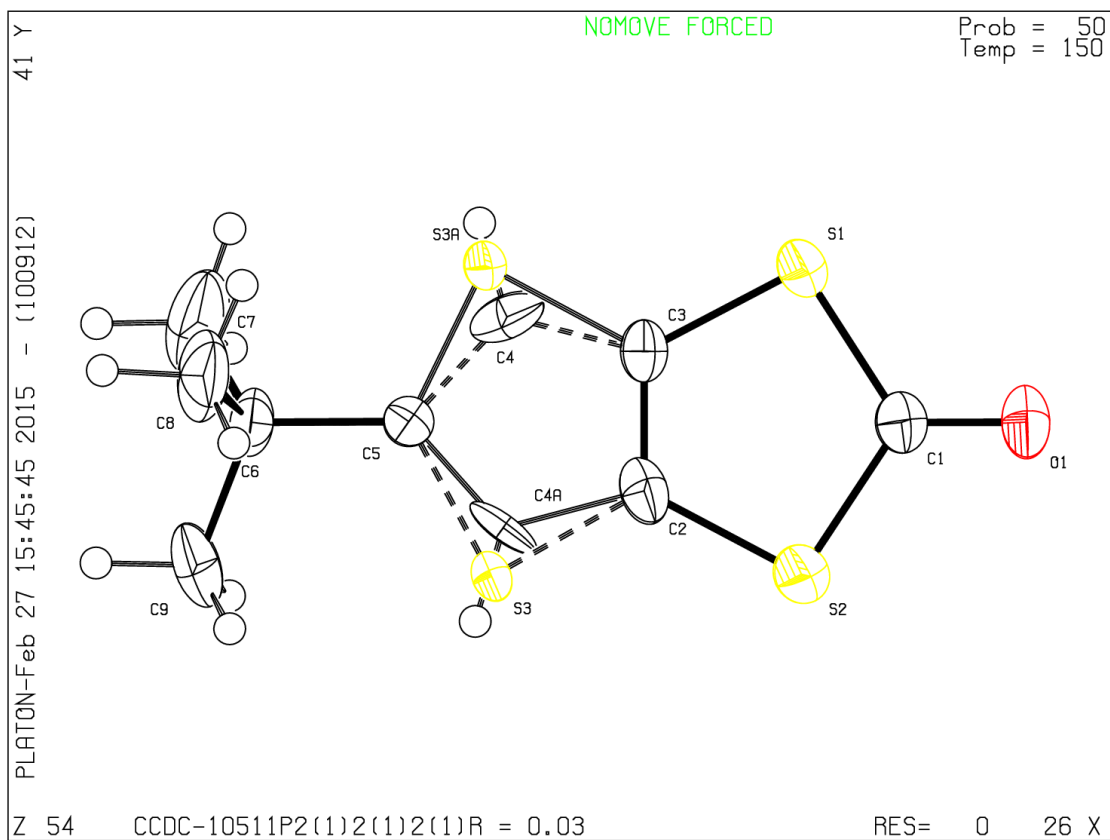

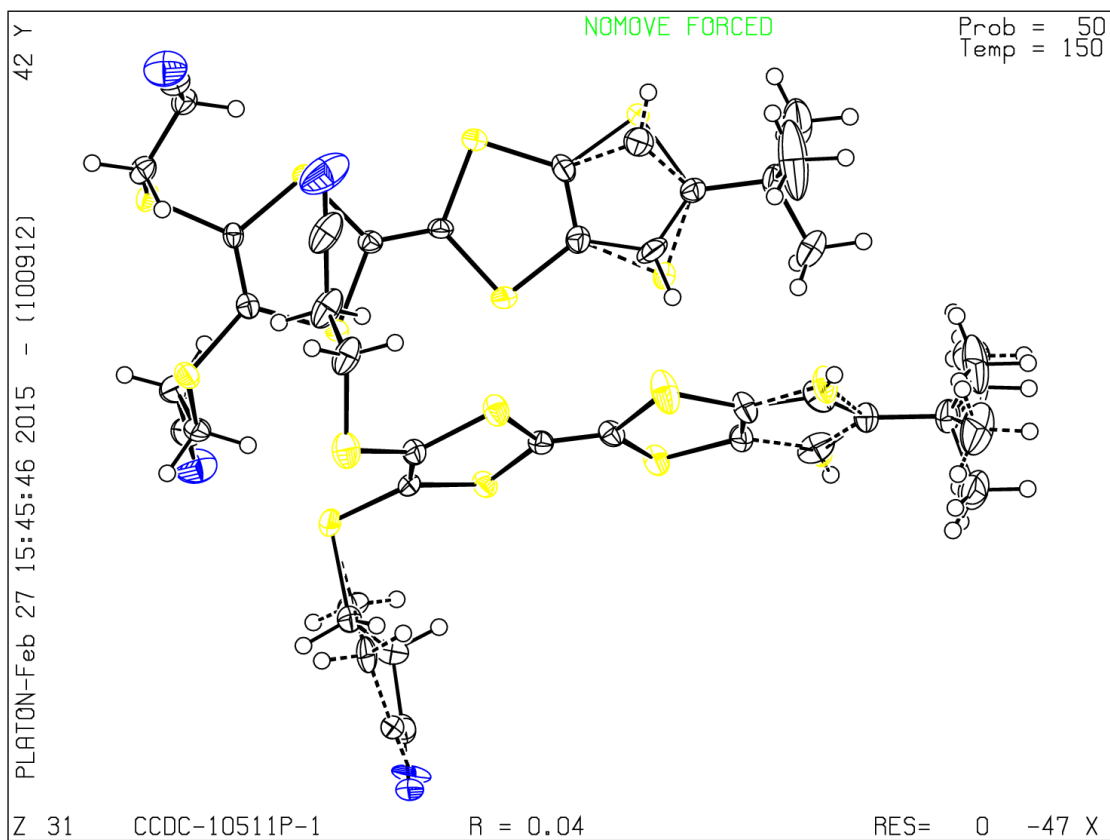



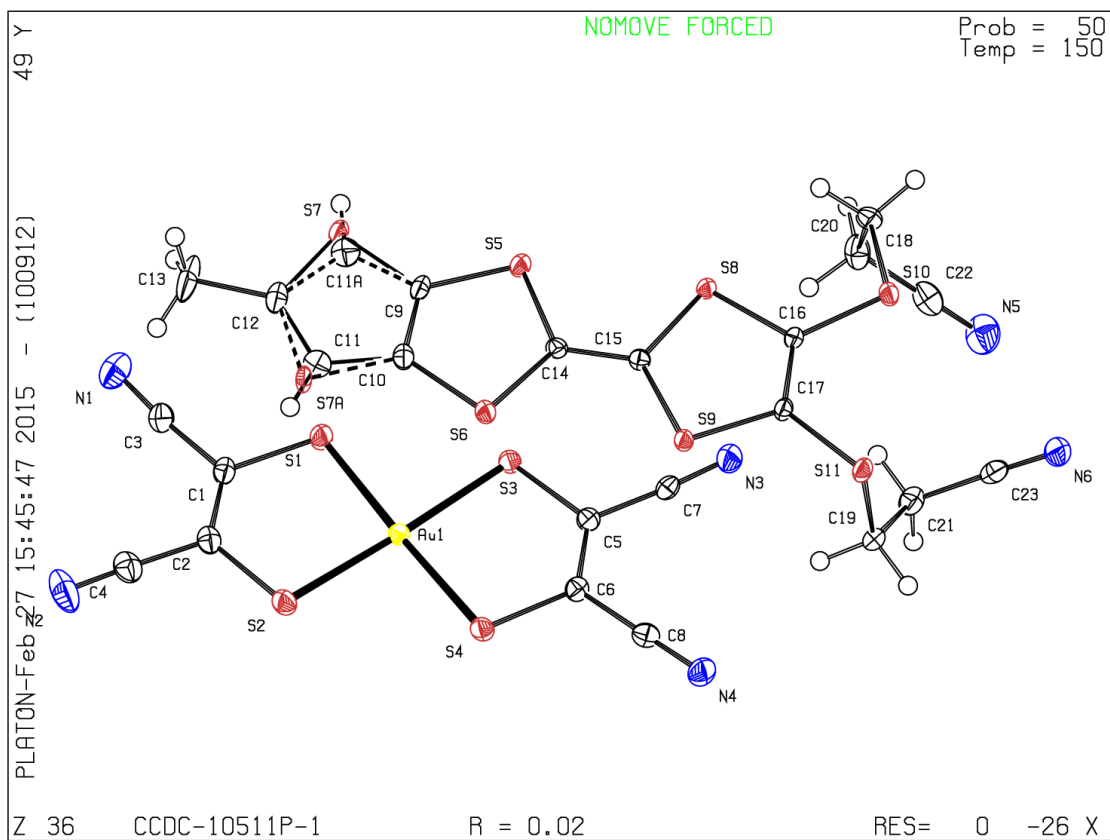

Supplement: Additional file 5 [file 1860-5397-11-71-S5.pdf]
